# Supplementary material for: Performance and Stability of Tenofovir Alafenamide Formulations within Subcutaneous Biodegradable Implants for HIV Pre-Exposure Prophylaxis (PrEP)
Source: PubMed Central journal article supplement (PMC7694512; doi:10.3390/pharmaceutics12111057), 2020-11-05
Supplement: pharmaceutics-12-01057-s001.pdf [file pharmaceutics-12-01057-s001.pdf]

Supplementary Materials

# Performance and Stability of Tenofovir Alafenamide Formulations within Subcutaneous Biodegradable Implants for HIV Pre-Exposure Prophylaxis (PrEP)

Linying Li, Leah M. Johnson, Sai Archana Krovi, Zach R. Demkovich and Ariane van der Straten

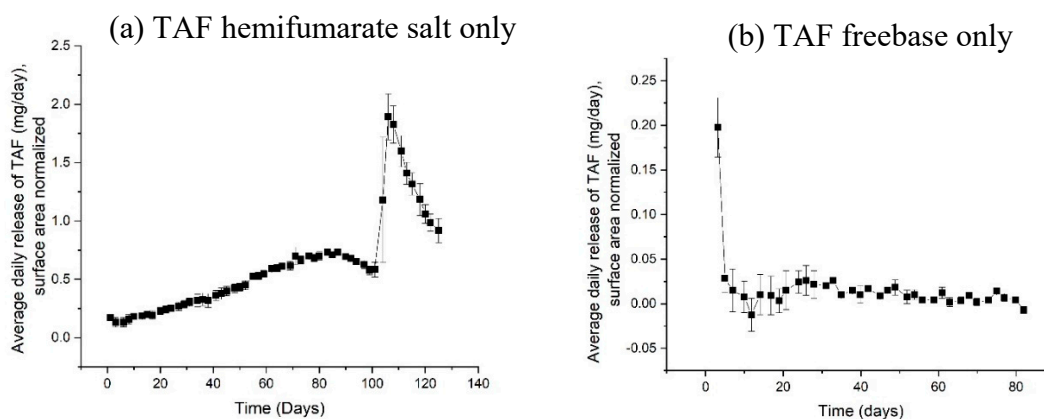

**Figure S1.** Daily release profiles of implants filled with TAF hemifumarate salt (TAF<sub>HF</sub>) (a) and TAF freebase (TAF<sub>FB</sub>) (b).

**Table S1.** Chromatographic purity of TAF<sub>HF</sub> formulated with castor oil or PEG600 inside implants exposed to simulated physiological conditions over 120 days.

| Chromatographic purity | TAF <sub>HF</sub> -Castor oil | TAF <sub>HF</sub> -PEG600 |
|------------------------|-------------------------------|---------------------------|
| Time 0                 | 99.8%                         | 99.7%                     |
| Day 14                 | 99.3%                         | 97.3%                     |
| Day 28                 | 98.9%                         | 94.8%                     |
| Day 42                 | 97.4%                         | 89.7%                     |
| Day 52                 | 96.0%                         | 76.0%                     |
| Day 62                 | 94.7%                         | 63.3%                     |
| Day 82                 | 82.6%                         | 40.3%                     |
| Day 92                 | 74.4%                         | 22.9%                     |
| Day 102                | 57.1%                         | 10.3%                     |
| Day 120                | 17.6%                         | 1.36%                     |

**Table S2.** Chromatographic purity of TAF<sub>FB</sub> formulated with sesame oil or castor oil inside implants exposed to simulated physiological conditions over 210 days.

|         | TAF <sub>FB</sub> -Sesame oil | TAF <sub>FB</sub> -Castor oil |
|---------|-------------------------------|-------------------------------|
| Day 0   | 99.8%                         | 99.8%                         |
| Day 90  | 98.4%                         | 97.1%                         |
| Day 120 | 98.0%                         | 96.5%                         |
| Day 150 | 96.0%                         | 92.5%                         |
| Day 180 | 94.9%                         | 88.5%                         |
| Day 210 | 92.0%                         | 84.5%                         |

**Table S3.** Water ingress within the implant reservoir of TAF<sub>HF</sub> formulated with castor oil or PEG600 measured via the loss-on-drying method.

| Formulations | TAF <sub>HF</sub> -Castor oil |                                            |                              | TAF <sub>HF</sub> -PEG600 |                 |                              |
|--------------|-------------------------------|--------------------------------------------|------------------------------|---------------------------|-----------------|------------------------------|
|              | Water content (mg)            | % water ingress (of total mass of implant) | Cumulative drug release (mg) | Water content (mg)        | % water ingress | Cumulative drug release (mg) |
| Time 0       | 0                             | 0%                                         | 0                            | 2.0                       | 2%              | 0                            |
| Day 14       | 0.6                           | 0.7%                                       | 4.2                          | 6.7                       | 8.1%            | 10.2                         |
| Day 28       | 1.0                           | 1.2%                                       | 8.3                          | 7.8                       | 9.4%            | 16.1                         |
| Day 42       | 1.5                           | 1.8%                                       | 15.4                         | 8.4                       | 10.1%           | 26.4                         |
| Day 52       | 2.1                           | 2.4%                                       | 19.6                         | 8.6                       | 10.3%           | 38.0                         |
| Day 62       | 3.0                           | 3.6%                                       | 22.1                         | 13.1*                     | 15.8%           | 54.5                         |
| Day 82       | 4.0                           | 4.8%                                       | 30.6                         | 10.9                      | 13.1%           | 52.6                         |
| Day 92       | 5.5                           | 6.6%                                       | 35.6                         | 13.2*                     | 15.9%           | 74.8                         |
| Day 102      | 8.2*                          | 9.8%                                       | 50.5                         | 13.3*                     | 16.0%           | 56.7                         |
| Day 120      | 9.7                           | 11.6%                                      | 44.6                         | 18.0*                     | 21.6%           | 102.9                        |

\* Implants are compromised.

**Table S4.** Water ingress within the implant reservoir of TAF<sub>FB</sub> formulated with castor oil or sesame oil measured via loss-on-drying method.

| Formulations | TAF <sub>FB</sub> -Sesame oil |                                            |                              | TAF <sub>FB</sub> -Castor oil |                 |                              |
|--------------|-------------------------------|--------------------------------------------|------------------------------|-------------------------------|-----------------|------------------------------|
|              | Water content (mg)            | % water ingress (of total mass of implant) | Cumulative drug release (mg) | Water content (mg)            | % water ingress | Cumulative drug release (mg) |
| Time 0       | 0                             | 0%                                         | 0                            | 0%                            | 0               | 0                            |
| Day 90       | 5.0                           | 2.1%                                       | 16.9                         | 11.7                          | 5.1%            | 22.0                         |
| Day 120      | 10.0                          | 4.6%                                       | 21.6                         | 19.6                          | 8.4%            | 29.8                         |
| Day 150      | 15.1                          | 6.9%                                       | 26.7                         | 29.1                          | 12.2%           | 38.3                         |
| Day 180      | 22.7                          | 10.6%                                      | 32.0                         | 50.1                          | 20.5%           | 47.6                         |
| Day 210      | 35.3                          | 15.4%                                      | 38.2                         | 55.4                          | 23.1%           | 60.1                         |

**Table 5.** Chromatographic purity profile of TAF<sub>HF</sub> castor oil and TAF<sub>FB</sub> sesame oil implants stored in open and closed foil pouches stored at 22 °C/50% RH and 40 °C/75% RH over 6-months.

| Formulation                   | Storage Condition    | Day 0 | Day 90 | Day 180 |
|-------------------------------|----------------------|-------|--------|---------|
| TAF <sub>HF</sub> -Castor oil | 22°C/50% RH (sealed) | 99.5% | 99.3%  | 99.1%   |
|                               | 22°C/50% RH (open)   | 99.5% | 99.3%  | 99.0%   |
|                               | 40°C/75% RH (sealed) | 99.5% | 98.8%  | 97.5%   |
|                               | 40°C/75% RH (open)   | 99.5% | 97.3%  | 91.2%   |
| TAF <sub>FB</sub> -Sesame oil | 22°C/50% RH (sealed) | 99.6% | 99.1%  | 98.0%   |
|                               | 22°C/50% RH (open)   | 99.6% | 98.5%  | 98.6%   |
|                               | 40°C/75% RH (sealed) | 99.6% | 98.8%  | 98.0%   |
|                               | 40°C/75% RH (open)   | 99.6% | 99.4%  | 97.5%   |
